1 **Title:**

2 High-throughput cell-based assays for the preclinical development of DsbA inhibitors as  
3 antivirulence therapeutics.

4 **Authors:** Anthony D. Verderosa<sup>1,2</sup>, Rabeb Dhouib<sup>1,2</sup>, Yaoqin Hong<sup>1,2</sup>, Begoña Heras<sup>3</sup>, and  
5 Makrina Totsika<sup>1,2\*</sup>.

6 **Affiliations:**

7 [1] Institute of Health and Biomedical Innovation, [2] School of Biomedical Sciences,  
8 Queensland University of Technology, Brisbane, Queensland, Australia, and [3] Department  
9 of Biochemistry and Genetics, La Trobe Institute for Molecular Science, La Trobe University,  
10 Bundoora, Australia.

11 **Running title:**

12 High throughput cell-based assays for DsbA inhibitors

13 **Keywords:**

14 Antimicrobials, antivirulence, infection, uropathogenic *Escherichia coli* (UPEC), oxidative  
15 protein folding, thiol, disulfide oxidoreductase, inhibitors, flagellar motility.

16 **Corresponding Author:**

17 M. Totsika, Ph.D., Institute of Health and Biomedical Innovation, School of Biomedical  
18 Sciences, Queensland University of Technology, QLD 4059, Australia  
19 (makrina.totsika@qut.edu.au).

20

21 **Abstract:**

22 Antibiotics are failing fast, and the development pipeline is alarmingly dry. New drug research  
23 and development is being urged by world health officials, with new antibacterials against  
24 multidrug-resistant Gram-negative pathogens as the highest priority. Antivirulence drugs,  
25 which are inhibitors of bacterial pathogenicity factors, are a class of promising antibacterials,  
26 however, their development is often stifled by lack of standardised preclinical testing akin to  
27 what guides antibiotic development. The lack of established target-specific microbiological  
28 assays amenable to high-throughput, often means that cell-based testing of virulence inhibitors  
29 is absent from the discovery (hit-to-lead) phase, only to be employed at later-stages of lead  
30 optimization. Here, we address this by establishing a pipeline of bacterial cell-based assays  
31 developed for the identification and early preclinical evaluation of DsbA inhibitors. Inhibitors  
32 of DsbA block bacterial oxidative protein folding and were previously identified by biophysical  
33 and biochemical assays. Here we use existing *Escherichia coli* DsbA inhibitors and  
34 uropathogenic *E. coli* (UPEC) as a model pathogen, to demonstrate that a combination of a  
35 cell-based AssT sulfotransferase assay and the UPEC motility assay, modified for a higher  
36 throughput format, can provide a robust and target-specific platform for the evaluation of DsbA  
37 inhibitors. Our pipeline could also be used in fragment and compound screening for the  
38 identification of new DsbA inhibitor classes or hits with a broad spectrum of activity. In  
39 conclusion, the establishment of accurate, high-throughput microbiological assays for  
40 antivirulence drug identification and early preclinical development, is a significant first step  
41 towards their translation into effective therapeutics.

42

43 **Importance:**

44 The safety net of last resort antibiotics is quickly vanishing as bacteria become increasingly  
45 resistant to most available drugs. If no action is taken, we will likely enter a post-antibiotic era,  
46 where common infections and minor injuries are once again lethal. The paucity in new  
47 antibiotic discovery of the past decades has compounded the problem of increasing antibiotic  
48 resistance, to the point that it now constitutes a global health crisis that demands global action.  
49 There is currently an urgent need for new antibacterial drugs with new targets and modes of  
50 action. To address this, research and development efforts into antivirulence drugs, such as  
51 DsbA inhibitors, have been ramping up globally. However, the development of microbiological  
52 assays as tools for effectively identifying and evaluating antivirulence drugs is lagging behind.  
53 Here, we present a high-throughput cell-based screening and evaluation pipeline, which could  
54 significantly advance development of DsbA inhibitor as antivirulence therapeutics.

55

## 56 **Introduction:**

57 In 2014 the World Health Organisation (WHO) released a statement declaring antimicrobial  
58 resistance (AMR) as a public health priority that demands decisive global action (1). Although  
59 WHO's statement has increased AMR awareness, at the time of writing over half a decade has  
60 passed, and little progress has been made in developing effective solutions (2, 3); meanwhile,  
61 AMR rates continue to rise. The current AMR crisis demands the urgent development of  
62 effective strategies to tackle bacterial infections. One actively researched strategy is the  
63 development of antivirulence therapeutics, which have recently been gaining momentum as  
64 effective antibacterials that can circumvent the mechanisms of antibiotic resistance (4).  
65 Antivirulence drugs target bacterial virulence factors and are designed to disarm pathogens,  
66 unlike conventional antibiotics which either kill or inhibit bacterial growth (5, 6). Targeting  
67 virulence factors can attenuate a pathogen's ability to cause infection and render bacteria  
68 susceptible to the host's defence systems (7). Consequently, virulence factors present a plethora  
69 of attractive targets for the development of new therapeutics.

70 Although several antivirulence drugs are currently under various stages of development, (e.g.  
71 toxin, adhesin, enzyme, secretion and quorum sensing inhibitors (6, 8, 9)) the potential of any  
72 antivirulence drug candidate for further clinical development relies on having established  
73 robust assays for evaluating their efficacy *in vitro* and *in vivo* (10). While the development of  
74 antibiotics over the past several decades, has benefited from standardised and comprehensive  
75 preclinical and clinical evaluation methods, the field of antivirulence drugs has had minimal  
76 guidelines for consistent testing, with only a few general guidelines reported for some types of  
77 inhibitors, e.g. for quorum sensing (10, 11). In addition, antivirulence inhibitor screening  
78 campaigns often utilise biophysical and/or biochemical assays (when the target is known),  
79 which do not allow early evaluation of inhibitor effects on bacterial cells (12), or on cell-based  
80 virulence assays (target agnostic), which might be prone to bias by reporting non-specific

81 inhibitor effects (11). Here we develop a pipeline of robust cell-based assays for the *in vivo*  
82 evaluation of inhibitors against the DsbA antivirulence target.

83 In Gram-negative pathogens, the biogenesis and function of many virulence factors are  
84 intrinsically linked to the redox enzyme pair of DsbA and DsbB (13-16). DsbA is a periplasmic  
85 oxidoreductase which catalytically introduces disulfide bonds into secreted and outer  
86 membrane proteins (17), while its inner membrane partner DsbB reoxidises DsbA (18, 19).  
87 Intramolecular disulfide bonds are often essential for the native folding and subsequent  
88 function of multiple secreted or surface proteins, including fimbriae, flagellar motor, secretion  
89 systems, and secreted toxins (13, 16). Given that many of these proteins are *bona fide* virulence  
90 factors or form integral components of machinery for virulence factor assembly, this makes  
91 DsbA and DsbB ideal targets for the development of antivirulence drugs (13, 16, 20). Recently,  
92 several classes of small molecule inhibitors of DsbA, as well as inhibitors of its cognate DsbB,  
93 have been reported, primarily through screening campaigns involving biophysical and/or  
94 biochemical assays (12, 21-25). Any *in vivo* assessment of promising hits was typically  
95 conducted as part of subsequent testing, often at a stage where significant efforts into the  
96 chemical elaboration of initial hits had already taken place. Incorporation of cell-based testing  
97 at an earlier stage of inhibitor screening, as conducted for DsbB and its homologue VKOR  
98 (24), could be used to complement early hit selection by biophysical/biochemical approaches  
99 and likely save time and money, by informing which hits should be prioritised and what  
100 properties should be optimised (e.g. solubility, cell permeability, toxicity etc.).

101 For monitoring DsbA function *in vivo*, the bacterial motility assay on soft agar has been most  
102 commonly used (26-28) and more recently this method was applied to DsbA inhibitor testing  
103 *in vivo* (12, 29). In many pathogens, such as uropathogenic *Escherichia coli* (UPEC), and  
104 *Salmonella enterica* serovar Typhimurium (*S. Typhimurium*), motility requires the production  
105 of functional flagella, with DsbA playing a central role in the biogenesis of these surface

106 appendages (26, 30-33). The standard bacterial motility assay format (performed in Petri  
107 dishes) is however relatively low-throughput and requires large inhibitor quantities and manual  
108 data collection (29), thus, limiting its utility for high-throughput inhibitor screening and testing.  
109 A second method recently utilised for DsbA inhibitor testing monitors the enzymatic activity  
110 of AssT (29), an arylsulfate sulfotransferase encoded by several pathogens (e. g. UPEC, *S.*  
111 *Typhimurium*, *Klebsiella* (27, 28, 34, 35)), which is proposed to play a role in the intracellular  
112 detoxification of phenolic substances (36-38). AssT is a native substrate for DsbA and its  
113 homologue DsbL (39) as it requires the formation of a disulfide bond for its correct function  
114 (40). Consequently, AssT sulfotransferase activity can be used to measure DsbA activity *in*  
115 *vivo*, and can be monitored either in solution (39) or using an agar-based assay (27). Although  
116 very informative, previously used AssT assays have not been amenable to high-throughput  
117 inhibitor screening and testing. Here, we present a comprehensive pipeline of cell-based assays  
118 that provide an accurate and high throughput platform for the identification of DsbA inhibitors  
119 and their subsequent development, from hits to leads, and from lead optimisation to early  
120 preclinical candidate validation.

121

## 122 **Results:**

### 123 ***E. coli* motility can be accurately tracked spectrophotometrically.**

124 As bacterial motility assays are the most common method of assessing DsbA inhibitor efficacy,  
125 we first sought to develop a motility assay which would circumvent the limitations of the  
126 standard assay format and provide a platform which could be utilised earlier on in the drug  
127 development pipeline. We adapted a microtiter plate-based assay which had previously been  
128 reported for screening antimicrobial compounds using bacterial motility (41). We first  
129 confirmed that bacterial swimming motility could be accurately monitored

130 spectrophotometrically. As bacteria radially migrated through the soft agar, a zone of motility  
131 corresponding to an increase in absorbance at 600 nm was observed, and a motility curve could  
132 be generated over time (Figure 1). Using this method, the start, end, and motility rate (slope)  
133 of the tested *E. coli* strain (JCB816) could be accurately measured under a set of specific culture  
134 conditions.

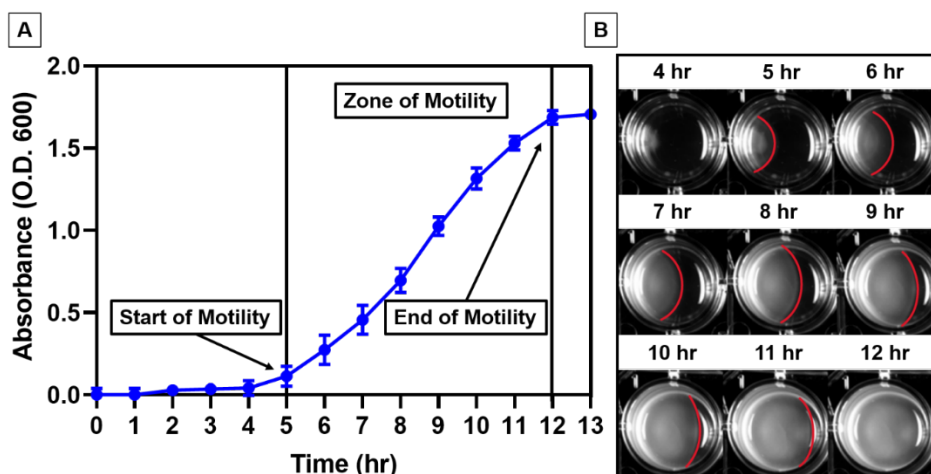

135

136 **Figure 1. Absorbance-based monitoring of *E. coli* motility.** (A) Motility curve of *E. coli*  
137 JCB816 monitored spectrophotometrically during incubation on soft LB agar at 37°C over 15  
138 hours, as detailed in methods. Data points represent hourly mean absorbance values  $\pm$  SD  
139 from 3 independent culture replicates. (B) Digital images tracking the swimming motility of *E.*  
140 *coli* JCB816 on soft LB agar in a 24-well plate. *E. coli* was inoculated at the left edge of each  
141 well, and by 12 hours incubation at 37°C the zone of motility (boundary marked in red) had  
142 reached the opposite edge of the well.

143

#### 144 **An absorbance-based bacterial motility assay optimised for DsbA inhibitor evaluation.**

145 To demonstrate the value of a plate reader-based motility assay in assessing antivirulence DsbA  
146 inhibitor hits, we generated motility curves for UPEC strain CFT073 in the presence and  
147 absence of phenylthiophene inhibitor F1 (Figure 2C), which we have previously shown to

148 inhibit DsbA in CFT073 using the traditional petri-dish motility assay (29). The motility of  
149 CFT073 in soft agar containing the DsbA inhibitor F1 at a concentration gradient (1-0.1 mM)  
150 was reduced compared to the vehicle control in a dose-dependent manner, with maximum  
151 motility inhibition observed at 1 mM F1 (97% compared to DMSO control at 10 hours post-  
152 inoculation) (Figure 2A). Analysing longitudinal motility data revealed that both the start time  
153 and the rate of motility are directly related to F1 inhibitor concentration, with higher  
154 concentrations resulting in longer motility start times and slower motility rates (Table 1) -  
155 effects that were previously evident with the conventional motility assay methodology (26).  
156 Furthermore, the high reproducibility of our assay allowed for even small changes in motility  
157 rate to be robustly detected ( $P < 0.0001$ , one-way ANOVA test) between different F1 treatment  
158 groups (Table 1). Using the calculated rate of motility for each F1 concentration, the F1 dose-  
159 response curve was generated (Figure 2B) with the half maximal inhibitory concentration  
160 ( $IC_{50}$ ) of F1 calculated at the 0.35-0.47 mM range.  $IC_{50}$  values in the mM range are indicative  
161 of modest affinity inhibitor hits that represent good candidates for synthetic optimisation.  
162 Taken together, our absorbance-based motility assay proved to be of value in generating  
163 accurate and highly reproducible motility curve data that could be used to identify and  
164 characterise early hits from DsbA inhibitor screening campaigns, such as inhibitor F1 (12).  
165 Moreover, this motility assay format (24-well plate) required almost 29-fold less inhibitor than  
166 the standard petri-dish assay (0.14 mg/well versus 4 mg/petri-dish) and used an automated data  
167 collection pipeline that markedly reduced assay hands-on time. Optimising the assay for a 24-  
168 or 48- well plate format also increases the applicability of the assay for medium-throughput  
169 inhibitor screens, however, this assay cannot be optimally adapted for high-throughput  
170 screening (e.g. 96 or 384-well plate format), which would be typically employed in early  
171 screening campaigns using large fragment/compound libraries.



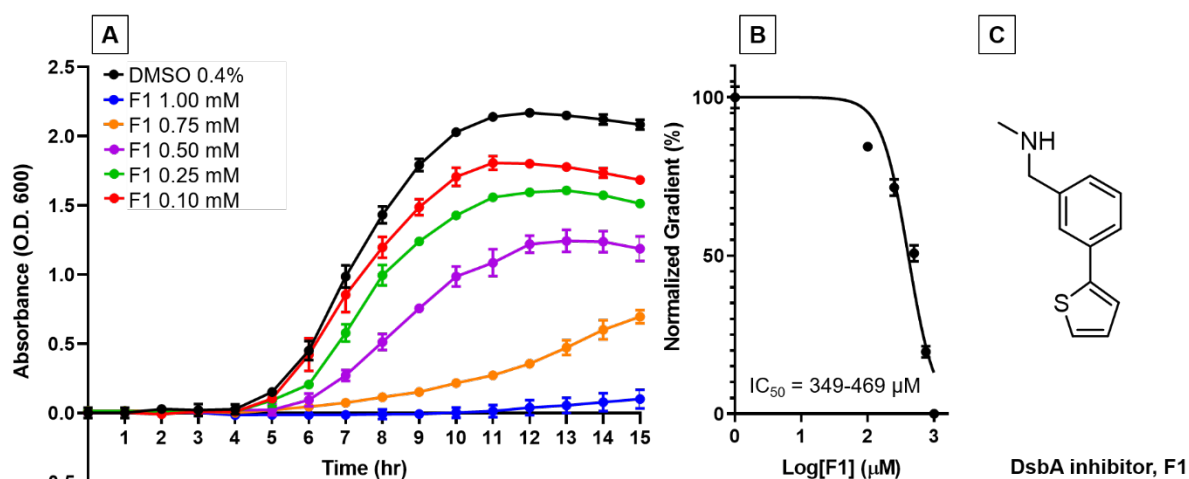

172

173 **Figure 2. Absorbance-based UPEC motility in varying concentrations of DsbA inhibitor F1.**

174 (A) Motility curves and (B) motility dose-response curve of UPEC CFT073 on LB agar (0.25%)

175 containing DsbA inhibitor F1 (1-0.1 mM) or 0.4% DMSO (vehicle control), generated as

176 detailed in methods. (C) chemical structure of DsbA inhibitor F1. Data points represent the

177 mean  $\pm$  SD of 3 biological replicates.

178

179 **Table 1. Motility curve parameters for UPEC CFT073 in the presence of varying**

180 concentrations of DsbA inhibitor F1.

| F1 (mM) | Start of motility (hr) | End of motility (hr) | Rate of motility (slope) <sup>a</sup> | Inhibition of motility (%) <sup>b</sup> |
|---------|------------------------|----------------------|---------------------------------------|-----------------------------------------|
| 1       | 11                     | n/d                  | 0.02 $\pm$ 0.007                      | 97                                      |
| 0.75    | 7                      | n/d                  | 0.09 $\pm$ 0.013                      | 89                                      |
| 0.5     | 6                      | 12                   | 0.21 $\pm$ 0.02                       | 51                                      |
| 0.25    | 5                      | 11                   | 0.28 $\pm$ 0.02                       | 30                                      |
| 0.1     | 5                      | 11                   | 0.33 $\pm$ 0.01                       | 17                                      |
| 0       | 5                      | 11                   | 0.38 $\pm$ 0.03                       | n/a                                     |

181 <sup>a</sup>motility rates shown as mean slope value  $\pm$  S.D. from four biological replicates. Group means  
182 were compared using the one-way ANOVA test ( $P < 0.0001$ ).

183 <sup>b</sup>compared to vehicle control (DMSO 0.4%) and determined using data from the 10 -hour time  
184 point

185 n/d = not determined.

186

187 **Establishing a high throughput cell-based enzymatic assay for DsbA inhibitor screening**  
188 **and development.**

189 Enzymatic assays are better suited to high-throughput inhibitor screening campaigns. Thus, we  
190 sought to develop a cell-based assay for monitoring the activity of the AssT enzyme, which is  
191 a native DsbA substrate in UPEC. We first determined if AssT's sulfotransferase activity could  
192 be assayed in solution using live UPEC cells cultured in standard laboratory conditions. The  
193 AssT overexpressing strain CFT073/pAssT was cultured overnight in LB (with appropriate  
194 selection to maintain the pAssT vector or pSU2718 vector control), and culture aliquots were  
195 mixed in a 96-well plate with the aryl sulfate phenolic donor, 4-methylumbelliferyl sulfate  
196 (MUS) and the phenol acceptor, phenol (detailed in methods and Figure 6). AssT catalysed the  
197 cleavage of the sulfate group from the non-fluorescent substrate MUS to the highly fluorescent  
198 product 4-Methylumbelliferone (MU) (Scheme 1) (42). A steady increase in fluorescence was  
199 observed over time for strain CFT073/pAssT, but not for the vector control (Figure 3A),  
200 confirming production of functional AssT enzyme which catalysed the conversion of MUS and  
201 phenol in the UPEC periplasm (where AssT and DsbA localise) *in vivo*. Retaining LB growth  
202 medium in the assay reaction, which significantly reduced assay time and labour-intensiveness,  
203 did not block or interfere with the fluorescence output of the sulfotransferase reaction (data not  
204 shown).

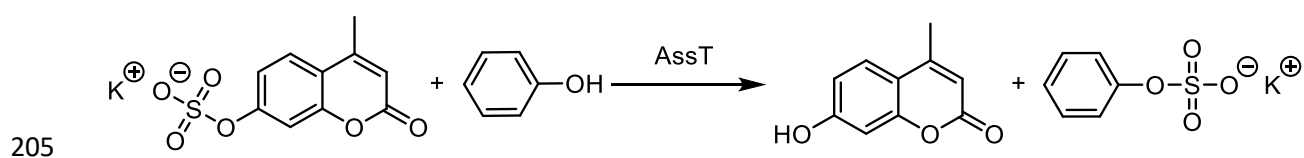

206 **Scheme 1.** AssT catalysed conversion of MUS to MU.

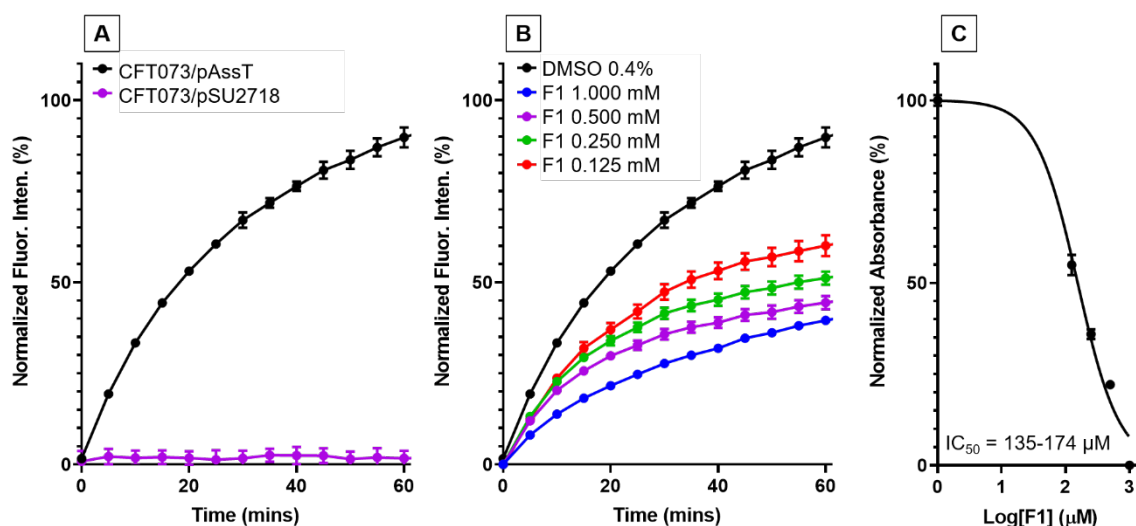

207

208 **Figure 3. Cell-based AssT activity in UPEC CFT073 in varying concentrations of DsbA**

209 **inhibitor F1. Sulfotransferase activity of (A) CFT073/pASST and CFT073/pSU2718 (vector**

210 **control), (B) CFT073/pAssT, and (C) corresponding dose-response curve (calculated at 40-**

211 **minute time point) cultured in the presence of F1 (1-0.125 mM) or 0.4% DMSO (vehicle**

212 **control). F1 treated bacterial cultures were mixed with MUS and phenol and immediately**

213 **monitored spectrofluorometrically as detailed in methods. Data are shown as normalised**

214 **fluorescence intensity units, with the mean  $\pm$  SD of 3 biological replicates plotted at each time**

215 **point.**

216

217 **The cell-based AssT sulfotransferase assay offers a high-throughput platform for DsbA**

218 **inhibitor development.**

219 We hypothesised that inhibition of DsbA in CFT073/pAssT would result in misfolding of the

220 AssT enzyme and loss of sulfotransferase activity. To examine this hypothesis, we repeated

221 the AssT assay with CFT073/pAssT cells treated with various concentrations of DsbA inhibitor

222 F1 (1-0.125 mM). Sulfotransferase activity was significantly decreased at all tested F1

223 concentrations (Figure 3B), with lowest fluorescence measured from cells cultured at an F1

224 concentration of 1 mM (55% reduction compared to vehicle (DMSO) control). Reduction of  
225 AssT sulfotransferase activity by F1 was dose-dependent, and from the dose-response curve  
226 F1 had an  $IC_{50}$  value in the 0.14-0.17 mM range (Figure 3C). This was similar to F1's  $IC_{50}$   
227 value range calculated from motility data, suggesting that the two assays are reporting similar  
228 DsbA inhibition of two independent virulence substrates. Taken together, these results  
229 demonstrate that DsbA inhibition results in loss of AssT sulfotransferase activity, confirming  
230 that our cell-based AssT sulfotransferase assay can be used for indirectly assessing DsbA  
231 inhibition in a high-throughput format.

232

### 233 **The cell-based AssT enzyme assay allows target-specific testing of DsbA inhibitor activity.**

234 With assay protocol and conditions optimised, we next sought to confirm the specificity of our  
235 AssT assay for the DsbA target. To investigate this, we utilised a previously characterised  
236 CFT073 mutant lacking DsbA and DsbL (a DsbA homologue encoded by UPEC (28)), which  
237 was transformed with a plasmid carrying the AssT enzyme (CFT073 $\Delta$ dsbA $\Delta$ dsbLI/pAssT).  
238 This strain lacking both DsbA homologues had significantly decreased fluorescence compared  
239 to the wild-type strain (CFT073/pAssT). *In trans* complementation with DsbA fully restored  
240 the mutant's fluorescence back to wild-type levels (Figure 4A), confirming that in our assay  
241 DsbA is required for the production of functional AssT enzyme. In addition, both the control  
242 strain CFT073/pAssT and the complemented mutant CFT073 $\Delta$ dsbA $\Delta$ dsbLI/pAssT/pEcDsbA  
243 were equally attenuated for AssT function when treated with 0.5 mM F1 inhibitor (Figure 4A).  
244 In contrast, the mutant (CFT073 $\Delta$ dsbA $\Delta$ dsbLI/pAssT) was unresponsive to F1 treatment, and  
245 its fluorescence profile remained unaltered upon treatment with 0.5 mM F1 or with DMSO  
246 (Figure 4A). These results confirm that our assay can identify inhibitors that specifically target  
247 DsbA, as DsbA is the main factor mediating high levels of functional AssT enzyme.

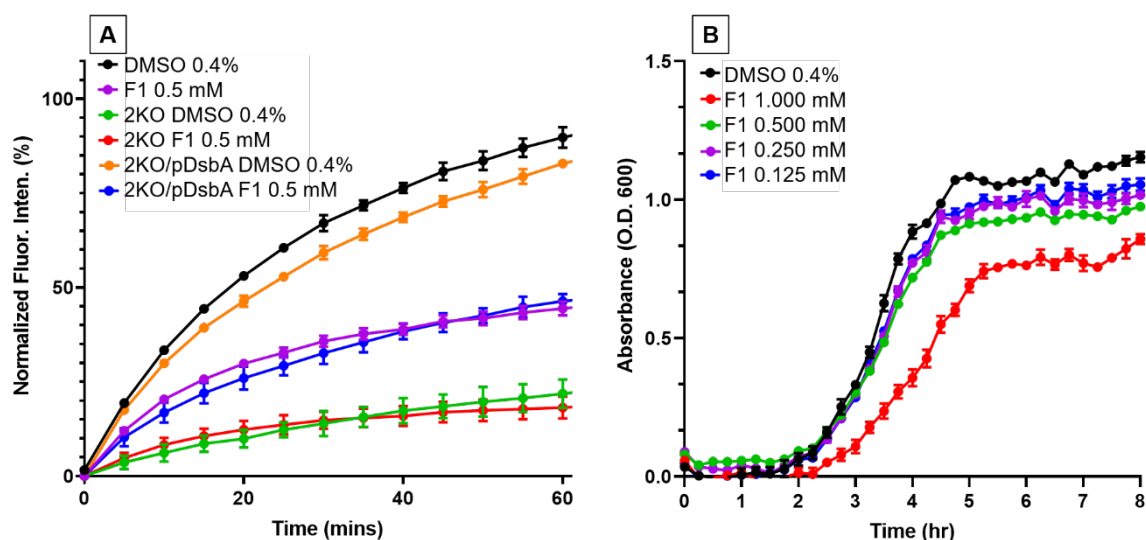

248

249 **Figure 4. F1 inhibitor effects on UPEC DsbA function and growth.** (A) Cell-based  
250 sulfotransferase activity of CFT073/pAssT grown in the presence of 0.4% DMSO (black) or  
251 0.5 mM F1 (purple); CFT073 $\Delta$ dsbA $\Delta$ dsbLI/pAssT (2KO) grown in the presence of 0.4% DMSO  
252 (green) or 0.5 mM F1 (red); and CFT073 $\Delta$ dsbA $\Delta$ dsbLI/pAssT/pEcDsbA (2KO/pDsbA) grown  
253 in the presence of 0.4% DMSO (orange) or 0.5 mM F1 (blue). (B) Growth curves of  
254 CFT073/pAssT cultured in LB medium containing F1 (1-0.125 mM) or 0.4% DMSO (vehicle  
255 control) and monitored spectrophotometrically (Optical Density (O.D.) at 600 nm) as detailed  
256 in methods. Data are normalised fluorescence intensity units (A) or absorbance at 600 nm (B),  
257 with mean  $\pm$  SD of 3 biological replicates plotted at each time point.

258

259 **Adding a growth analysis step prior to assessing sulfotransferase activity in the cell-based**  
260 **AssT assay simultaneously screens for inhibitor effects on DsbA function and bacterial**  
261 **growth.**

262 DsbA is not required for UPEC growth in rich media and standard laboratory culture conditions  
263 (28). As such, inhibitors specific to DsbA would be predicted to have no effect on UPEC  
264 growth under these conditions. On the other hand, large libraries of low affinity compounds,

265 such as those typically used in early inhibitor screens, could contain several compounds with  
266 bacterial growth toxicity. In order to incorporate growth testing as part of our high-throughput  
267 cell-based AssT assay, UPEC growth was continuously monitored (step 1) during culture for  
268 the preparation of live-cell samples for sulfotransferase activity testing (step 2). Testing F1 in  
269 the growth analysis step of the sulfotransferase assay, revealed that UPEC growth was slightly  
270 reduced in the presence of 1 mM F1, with no growth defects observed at lower F1  
271 concentrations (0.5-0.125 mM) (Figure 4B). In addition to uncovering this small growth defect  
272 at high F1 concentration, incorporating the growth step in our assay allowed us to account for  
273 any potential reduction in viable cells present in culture samples tested for sulfotransferase  
274 activity. Having an accurate O.D. 600 nm reading at the time of culture collection, ensured that  
275 all samples tested in the AssT assay could be easily adjusted to contain the same number of  
276 live cells, which was confirmed by plating samples for viable CFU (data not shown). These  
277 results demonstrate that adding a growth analysis step to the cell-based sulfotransferase enzyme  
278 assay allows growth related inhibitor effects to be identified and corrected prior to downstream  
279 inhibitor testing.

280

281 **Discussion:**

282 Antimicrobial drug development typically starts with screening large fragment or compound  
283 libraries to identify initial hits and the subsequent chemical elaboration of different hit series.  
284 Such screening campaigns represent a big investment, in terms of time and resources, both for  
285 the industry and for the academic lab. Success relies heavily on the use of well-established,  
286 accurate reporter assays that can identify hits with some degree of target-specificity and are  
287 amenable to high-throughput testing of several thousands of compounds at once. For  
288 antibiotics, such testing is now considered routine and follows global standards and guidelines  
289 (43, 44). For non-traditional antibacterials, however, which are currently being actively  
290 explored as viable solutions to the pressing problem of AMR, consistency in drug testing and  
291 reporting is far from achieved. For antivirulence drugs in particular, a major challenge lies in  
292 standardising preclinical testing for a largely diverse set of targets that potentially mediate  
293 multiple different phenotypes in bacterial pathogens. Measuring virulence target inhibition  
294 reliably and at large-scale is often difficult when using microbiological assays, so when the  
295 target is known, inhibitor screening and early evaluation typically relies on  
296 biochemical/biophysical approaches. This is the case for DsbA inhibitors that have been  
297 reported to date, with hits from several chemical classes having been identified as part of  
298 fragment-based screening campaigns primarily using saturation transfer distance NMR  
299 spectroscopy (12, 21-23). Later-stage microbiological evaluation has validated some but not  
300 all hits, and in some cases, even chemically elaborated analogues have failed to show activity  
301 in cell-based assays (12, 29 and unpublished data). In this study, we have adapted two cell-  
302 based assays previously used to monitor DsbA function *in vivo* for accurate and high-  
303 throughput testing of DsbA inhibitors. When combined, these assays could support DsbA  
304 inhibitor development from hit identification to lead optimisation and preclinical candidate  
305 validation.

306 Flagella-mediated bacterial motility is a useful reporter phenotype for DsbA activity and thus  
307 the standard petri-dish soft agar motility assay has been successfully used to evaluate DsbA  
308 inhibitors *in vivo* (12, 29). However, the current format of the bacterial motility assay in petri-  
309 dishes has several limiting factors, which are preventing its use in inhibitor screens: (i) a  
310 relatively low-throughput capacity, (ii) the requirement of high inhibitor quantities, and (iii)  
311 manual data collection by either incremental or single endpoint imaging (27, 29, 31). Our  
312 modified plate-reader motility assay utilises the same soft agar methodology, however, instead  
313 of relying on incremental images and manual measurements of motility zones, it uses a fully-  
314 automated system (plate-reader absorbance measurements) and requires no human intervention  
315 throughout the assay period making it less labour-intensive and less prone to bias or human  
316 error in motility assessments. In addition, automating the assay ensures conditions (e.g.  
317 temperature) are better controlled and can remain constant from start to finish. An important  
318 improvement was in that downscaling the assay from a petri-dish to a multi-well plate format,  
319 drastically reduced the quantity of inhibitor required (30-fold reduction in 24-well plate and  
320 60-fold reduction in 48-well plate, compared to previous method (29)). While others have  
321 demonstrated that agar-based motility assay can be performed in 96-well or even a 384-well  
322 plate (41, 45), we found that reducing the well diameter below 11 mm (48-well plate)  
323 drastically reduced within assay reproducibility, especially when testing inhibitors (data not  
324 shown). For this reason, our absorbance-based motility assay is better suited to inhibitor testing  
325 post-hit discovery, leaving the need for developing another cell-based DsbA reporter assay that  
326 was amenable to high throughput screening of DsbA inhibitors.

327 For developing such a high throughput assay, we chose to use a read-out that is a native  
328 virulence substrate of DsbA in UPEC. AssT is a large periplasmic enzyme encoded by UPEC  
329 and other intestinal bacteria (29) that was reported to be upregulated in the urine of UPEC-  
330 infected mice (46, 47), but was not required for colonisation of the murine bladder (29). The



331 gene encoding AssT is found in a tri-cistronic operon with the *dsbL* and *dsbI* genes, which  
332 encode an accessory redox protein pair in UPEC with specificity for AssT (39, 48), although  
333 the DsbA and DsbB redox pair was also shown to functionally fold AssT (27, 29). The AssT  
334 activity assay was previously performed in liquid medium using bacterial cell lysates (39) or  
335 on solid medium using whole live cells (27). To evaluate DsbA inhibitors, we have previously  
336 utilised the solid medium cell-based method to successfully quantify DsbA inhibition of AssT  
337 activity (29). Despite this being an accurate cell-based assay, its petri-dish format presented the  
338 same limitations as the standard bacterial motility assay above. The modified AssT  
339 sulfotransferase enzyme assay presented here operates on the same principle, yet its application  
340 is quite different. The assay is conducted in liquid media using live UPEC cells treated with  
341 minimal quantities of DsbA inhibitor, and the activity of AssT is assessed in an automated  
342 fashion by monitoring the MUS-phenol sulfotransferase reaction spectrofluorometrically in  
343 real-time (rather than as an endpoint (29)). In addition, conducting the enzyme assay in liquid  
344 medium significantly increased scalability while drastically reduced reaction volumes and the  
345 amount of substrate and inhibitor needed. In fact, by performing the assay in 96-well plates the  
346 amount of substrate and inhibitor used was reduced by 100-fold compared to previous assay  
347 methodology (29). While we showcased scalability by conducting the assay in a 96-well  
348 format, the assay can be additionally downscaled to suit a 384-well plate, which would further  
349 reduce the amount of substrate and inhibitor required (1000-fold reduction over the previous  
350 method (29)). The addition of a bacterial growth analysis step (prior to measuring AssT activity  
351 and during bacterial treatment with inhibitors) is also easily scalable to fit the 384-well format  
352 and would benefit future fragment-based drug design approaches.

353 In conclusion, our study describes the establishment of a microbiological assay pipeline that  
354 can support DsbA inhibitor development all the way from screening to early preclinical  
355 candidate validation. Our platform of assays is also suited to screening and evaluating other

356 antivirulence inhibitors (e.g. for flagella components, motility regulators, sulfotransferase  
357 activity), while also assessing their potential antibacterial activity (growth inhibition) at the  
358 same time. Importantly, we hope our study will serve as a paradigm for the development of  
359 similarly accurate, easy to perform, and high throughput cell-based assays that can advance the  
360 discovery and preclinical development of other antivirulence drugs that could offer future  
361 solutions to curbing the AMR crisis.

362

363 **Methods:**

364 **Bacterial strains, plasmids, and culture conditions**

365 All bacterial strains utilised in this study (Table 2) were routinely cultured at 37 °C in liquid or  
 366 on solid lysogeny broth (LB-Lennox) medium supplemented, when required, with  
 367 chloramphenicol (34 µg/mL) or ampicillin (100 µg/mL), or both. The expression of AssT and  
 368 DsbA from plasmids pAssT and pEcDsbA, respectively, did not require induction with  
 369 isopropyl β-D-1-thiogalactopyranoside (IPTG) as the basal level of expression was sufficient  
 370 for observed effects (27, 28, 29). CFT073 mutants were constructed previously using λ-red-  
 371 mediated homologous recombination as described elsewhere (28, 49). Plasmids pAssT (27),  
 372 pEcDsbA (28), and pSU2718 were routinely transformed into strains using electroporation.

373 **Table 2:** Table of bacterial strains and plasmids.

| <i>E. coli</i> strain or plasmid                  | Description                                   | Reference  |
|---------------------------------------------------|-----------------------------------------------|------------|
| <b>Strain name</b>                                |                                               |            |
| JCB816                                            | MC1000 <i>phoR</i> λ102                       | (50)       |
| CFT073                                            | UPEC isolate (O6:K2:H1)                       | (51)       |
| CFT073Δ <i>dsbA</i> Δ <i>dsbLI</i>                | CFT073Δ <i>dsbA</i> ::FRTΔ <i>dsbLI</i> ::FRT | (28)       |
| CFT073/pAssT                                      |                                               | This study |
| CFT073/pSU2718                                    |                                               | This study |
| CFT073Δ <i>dsbA</i> Δ <i>dsbLI</i> /pAssT         |                                               | This study |
| CFT073Δ <i>dsbA</i> Δ <i>dsbLI</i> /pAssT/pEcDsbA |                                               | This Study |
| <b>Plasmids</b>                                   |                                               |            |
| pAssT                                             | <i>assT</i> gene in pSU2718; Cm <sup>r</sup>  | (27)       |
| pEcDsbA                                           | <i>dsbA</i> gene in pUC19; Ap <sup>r</sup>    | (28)       |

374

## 375 **Chemicals and stock solutions**

376 Chloramphenicol, ampicillin, phenol, and MUS were purchased from Sigma-Aldrich  
377 (Australia), and F1 was purchased from Thermo Fisher Scientific (Australia). MUS (10 mM)  
378 and phenol (50 mM) solutions were prepared in sodium chloride (0.9%), and F1 (250 mM)  
379 solution was prepared in dimethyl sulfoxide (DMSO). All stock solutions were stored in the  
380 absence of light at -20 °C. Working solutions were prepared in LB-Lennox and were used on  
381 the same day.

## 382 **Absorbance-based bacterial motility assay**

383 Bacterial strains were grown by static 24-hour culture in LB-Lennox media at 37 °C. Cultures  
384 were normalized to an O.D. 600 nm of 2 ( $\sim 2 \times 10^9$  CFU/mL) using a spectrophotometer. The  
385 multi-well soft agar plates were prepared by adding a volume of 700  $\mu$ L (24-well) or 350  $\mu$ L  
386 (48-well) of soft LB-Lennox agar (0.25 % [wt/vol]), containing either DMSO (0.4%, vehicle  
387 control) or the inhibitor F1 at various concentrations (1-0.1 mM), to each well of the plate. The  
388 soft agar was allowed to solidify for at least 2 hours at room temperature (21 °C), before being  
389 inoculated in the left-hand corner of each well with 1  $\mu$ L of normalized culture ( $\sim 2 \times 10^9$   
390 CFU/mL). Inoculated plates were incubated at room temperature for 20 minutes to allow the  
391 inoculum to dry. The zone of motility was measured by incubating plates at 37 °C in a  
392 CLARIOstar<sup>®</sup> plate reader (BMG, Australia) programmed to measure absorbance (O.D. 600  
393 nm) at each hour over 15 hours (Figure 5). Absorbance measurements were made using the  
394 inbuilt spiral averaging function with orbital averaging producing similar results (data not  
395 shown). Instrument data were normalized (with DMSO vehicle control data set at 100%) and  
396 plotted using GraphPad Prism 8. Mean motility values were calculated from 3 biological  
397 replicates of each strain tested under each specific condition. The start and end of motility were  
398 estimated from motility curves and were defined as the beginning and endpoints, respectively,

399 of the exponential phase (zone of motility). The slope of each zone of motility was calculated  
400 in Excel and group means were compared for statistical differences by one-way ANOVA ( $p <$   
401 0.05) in GraphPad Prism 8. F1 dose-response curves were generated using the motility slopes,  
402 and the corresponding  $IC_{50}$  value was calculated by applying a non-linear regression (curve fit).

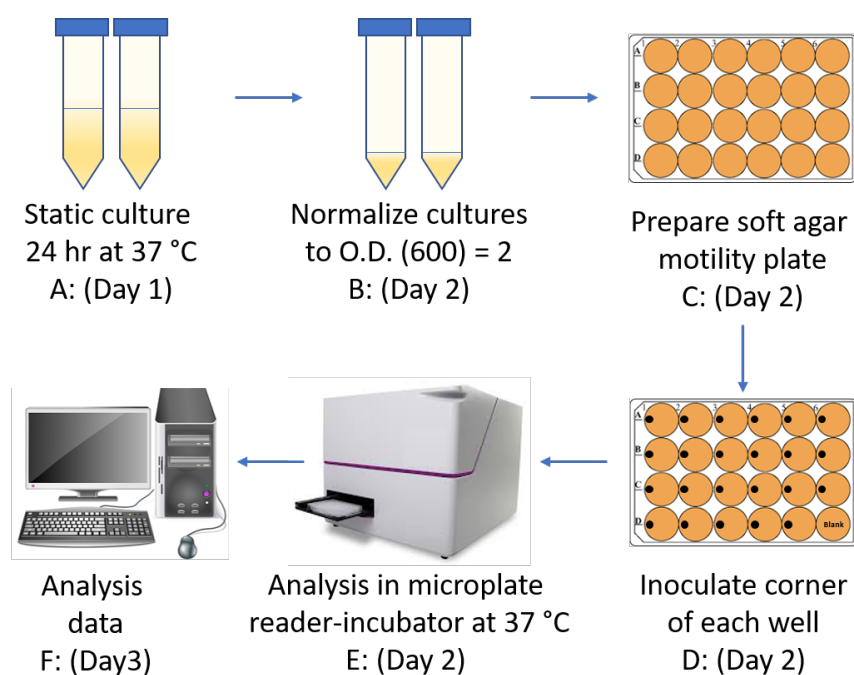

403

404 **Figure 5. Overview of absorbance-based bacterial motility assay.** (A): Bacterial strains were  
405 cultured statically in LB-Lennox media for 24 hours. (B) Overnight cultures were normalized  
406 to an O.D. 600 nm of 2. (C) 24-well motility plates were prepared by pipetting 700  $\mu$ L of warm  
407 (55 °C) soft LB agar (0.25%) in each well supplemented with F1 inhibitor or vehicle control  
408 (DMSO). The soft agar was allowed to solidify at room temperatures for at least 2 hours. (D)  
409 1  $\mu$ L of bacterial culture fixed at O.D. 600 nm = 2 was inoculated onto the surface of triplicate  
410 soft agar wells by depositing the inoculum at the left edge of the well (with care not to penetrate  
411 the agar). The inoculum was allowed to dry onto the agar for 20 minutes at room temperature  
412 before the plate was covered with a plastic lid. (E) Bacterial swimming motility was monitored  
413 spectrophotometrically for 15-hours in a BMG plate reader at 37°C (using orbital, spiral, or  
414 matrix averaging to ensure optimal well coverage). (F) Data acquisition and analysis.

#### 415 **Cell-based AssT sulfotransferase enzyme assay**

416 Bacterial strains were cultured in LB media, supplemented with antibiotics as appropriate, at  
417 37 °C overnight with shaking at 200 rpm. Overnight cultures were used as inocula in bacterial  
418 growth assays (step 1) conducted in a 96-well plate by preparing two-fold serial dilutions of  
419 F1 inhibitor compound at twice the desired final concentration in LB-Lennox medium (100 µL  
420 final volume). Each well was then inoculated with 100 µL of  $1 \times 10^7$  CFU/mL inoculum, to  
421 give a total well volume of 200 µL and a final cell concentration of  $5 \times 10^5$  CFU/mL. The  
422 growth analysis plate was covered with a breathable sealing membrane (Breathe-Easy® sealing  
423 membrane, Sigma, Australia), and incubated at 37 °C for 15 hours with shaking (300 rpm) in  
424 a CLARIOstar® plate reader (BMG, Australia) programmed to obtain O.D. 600 nm  
425 measurements every 15 minutes over the 15-hour period. At the end of the culture period, each  
426 well was normalized to an O.D. 600 nm of 0.4 ( $\sim 3.5 \times 10^8$  CFU/mL) in a fresh 96-well plate  
427 (step 2), to ensure that each well contained an equal number of cells. Wells were then  
428 supplemented with 4-methylumbelliferyl sulfate (MUS, Sigma, Castle Hill, Australia) (0.5 mM  
429 final concentration), and phenol (Sigma, Castle Hill, Australia) (1 mM final concentration) and  
430 sulfotransferase activity was monitored immediately in a CLARIOstar® plate reader (BMG,  
431 Australia) by measuring fluorescence emitted at 450-480 nm (excitation wavelength at 360-  
432 380 nm) and measurements acquired every 5 minutes over a 60 - 90 minute time period (Figure  
433 6). Instrument data were normalized (with DMSO vehicle control set at 100%) and analysed  
434 using GraphPad Prism 8. The F1 dose-response curve was generated using fluorescence data  
435 from the 40-minute time point, and the corresponding  $IC_{50}$  value was calculated by applying a  
436 non-linear regression (curve fit).

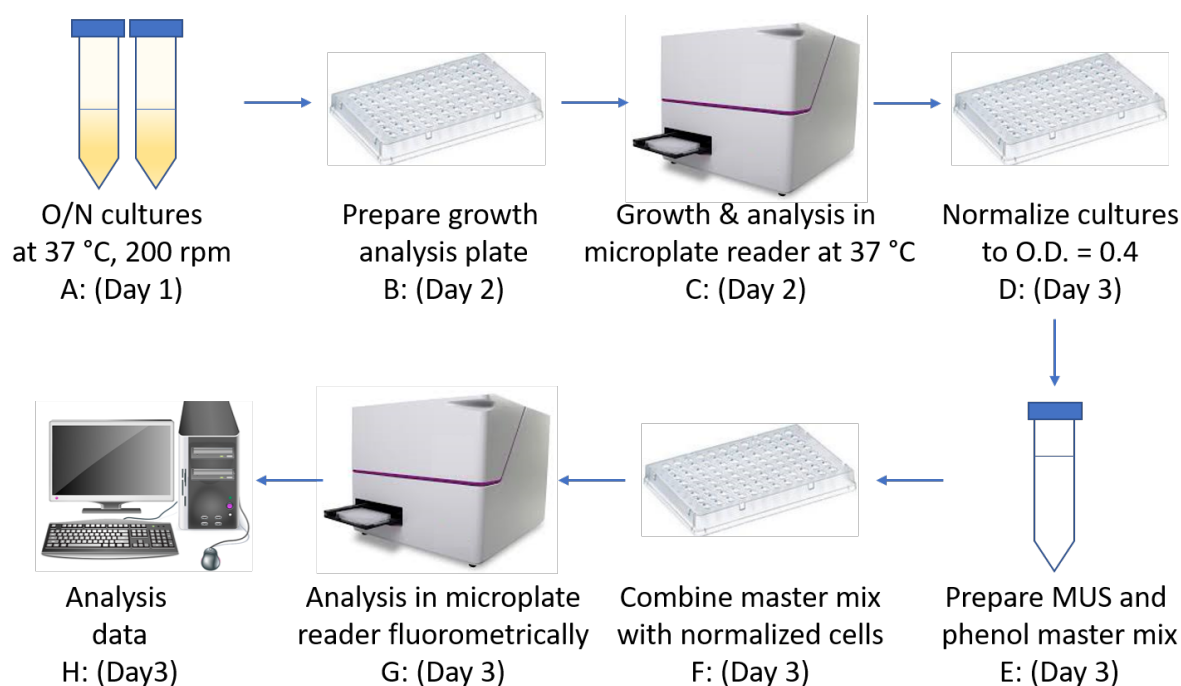

437

438 **Figure 6. Overview of cell-based *AssT* sulfotransferase assay.** (A) Bacterial strains were  
439 cultured in LB-Lennox media overnight at 37 °C with aeration (200 rpm). (B) Growth analysis  
440 plates were prepared by subculturing the O/N cultures from (A) into a 96-well plate containing  
441 the test inhibitors (akin to preparing an MIC challenge plate). (C) Growth plates were  
442 incubated at 37 °C, 300 rpm, in a microplate reader programmed to take O.D. 600 nm readings  
443 every 15 minutes for 15 hours. (D) Growth plate cultures were transferred in a fresh 96-well  
444 plate with each culture well normalised at an O.D. 600 nm of 0.4. (E) A master mix containing  
445 4 μL of phenol (50 mM), 10 μL of MUS (10 mM), and 126 μL of LB-Lennox per reaction well  
446 was prepared. (F) The reaction master mix (140 μL) was added to normalized cultures (60 μL)  
447 and mixed. (G) Fluorescence at 450-480 nm was immediately monitored in a CLARIOstar®  
448 plate reader (BMG, Australia) with measurements obtained every 5 minutes for up to 90  
449 minutes. (H): Data acquisition and analysis.

450

451

452 **Acknowledgments:**

453 This work was supported by a National Health and Medical Research Council Project Grant  
454 (APP1144046) and a Clive and Vera Ramaciotti Health Investment Grant (2017HIG0119). MT  
455 was supported by a Queensland University of Technology Vice-Chancellor's Research  
456 Fellowship.

457

458 **References:**

- 459 1. World Health O. 2014. Antimicrobial resistance: global report on surveillance. World  
460 Health Organization, Geneva.
- 461 2. World Health O. 2019. Antibacterial agents in clinical development: an analysis of the  
462 antibacterial clinical development pipeline. Organization WH, Geneva.
- 463 3. World Health O. 2019. Antibacterial agents in preclinical development: an open  
464 access database. Organization WH, Geneva.
- 465 4. Allen RC, Popat R, Diggle SP, Brown SP. 2014. Targeting virulence: can we make  
466 evolution-proof drugs? *Nat Rev Microbiol* 12:300-8.
- 467 5. Escaich S. 2008. Antivirulence as a new antibacterial approach for chemotherapy.  
468 *Curr Opin Chem Biol* 12:400-408.
- 469 6. Dickey SW, Cheung GYC, Otto M. 2017. Different drugs for bad bugs: antivirulence  
470 strategies in the age of antibiotic resistance. *Nat Rev Drug Discov* 16:457-471.
- 471 7. Heras B, Scanlon MJ, Martin JL. 2015. Targeting virulence not viability in the search  
472 for future antibacterials. *Br J Clin Pharmacol* 79:208-15.
- 473 8. Fleitas Martínez O, Cardoso MH, Ribeiro SM, Franco OL. 2019. Recent Advances in  
474 Anti-virulence Therapeutic Strategies With a Focus on Dismantling Bacterial  
475 Membrane Microdomains, Toxin Neutralization, Quorum-Sensing Interference and  
476 Biofilm Inhibition. *Frontiers in cellular and infection microbiology* 9:74-74.
- 477 9. Lyons BJE, Strynadka NCJ. 2019. On the road to structure-based development of  
478 anti-virulence therapeutics targeting the type III secretion system injectisome.  
479 *MedChemComm* 10:1273-1289.
- 480 10. Totsika M. 2016. Benefits and Challenges of Antivirulence Antimicrobials at the  
481 Dawn of the Post-Antibiotic Era. *Current Medicinal Chemistry* 6:30-37.
- 482 11. Defoirdt T, Brackman G, Coenye T. 2013. Quorum sensing inhibitors: how strong is  
483 the evidence? *Trends Microbiol* 21:619-24.
- 484 12. Adams LA, Sharma P, Mohanty B, Ilyichova OV, Mulcair MD, Williams ML,  
485 Gleeson EC, Totsika M, Doak BC, Caria S, Rimmer K, Horne J, Shouldice SR,  
486 Vazirani M, Headey SJ, Plumb BR, Martin JL, Heras B, Simpson JS, Scanlon MJ.  
487 2015. Application of Fragment-Based Screening to the Design of Inhibitors of  
488 *Escherichia coli* DsbA. *Angew Chem Int Ed Engl* 54:2179-2184.
- 489 13. Heras B, Shouldice SR, Totsika M, Scanlon MJ, Schembri MA, Martin JL. 2009.  
490 DSB proteins and bacterial pathogenicity. *Nat Rev Microbiol* 7:215-25.



- 491 14. Lasica AM, Jagusztyn-Krynicka EK. 2007. The role of Dsb proteins of Gram-  
492 negative bacteria in the process of pathogenesis. *FEMS Microbiol Rev* 31:626-36.
- 493 15. Yu J, Kroll JS. 1999. DsbA: a protein-folding catalyst contributing to bacterial  
494 virulence. *Microbes and Infection* 1:1221-1228.
- 495 16. Landeta C, Boyd D, Beckwith J. 2018. Disulfide bond formation in prokaryotes. *Nat*  
496 *Microbiol* 3:270-280.
- 497 17. Bardwell JC. 1994. Building bridges: disulphide bond formation in the cell. *Mol*  
498 *Microbiol* 14:199-205.
- 499 18. Bardwell JC, Lee JO, Jander G, Martin N, Belin D, Beckwith J. 1993. A pathway for  
500 disulfide bond formation in vivo. *Proceedings of the National Academy of Sciences*  
501 90:1038.
- 502 19. Missiakas D, Georgopoulos C, Raina S. 1993. Identification and characterization of  
503 the *Escherichia coli* gene dsbB, whose product is involved in the formation of  
504 disulfide bonds in vivo. *Proceedings of the National Academy of Sciences* 90:7084.
- 505 20. Smith RP, Paxman JJ, Scanlon MJ, Heras B. 2016. Targeting Bacterial Dsb Proteins  
506 for the Development of Anti-Virulence Agents. *Molecules* 21.
- 507 21. Halili MA, Bachu P, Lindahl F, Bechara C, Mohanty B, Reid RC, Scanlon MJ,  
508 Robinson CV, Fairlie DP, Martin JL. 2015. Small Molecule Inhibitors of Disulfide  
509 Bond Formation by the Bacterial DsbA–DsbB Dual Enzyme System. *ACS Chemical*  
510 *Biology* 10:957-964.
- 511 22. Duncan LF, Wang G, Ilyichova OV, Scanlon MJ, Heras B, Abbott BM. 2019. The  
512 Fragment-Based Development of a Benzofuran Hit as a New Class of *Escherichia*  
513 *coli* DsbA Inhibitors. *Molecules* 24.
- 514 23. Mohanty B, Rimmer K, McMahon RM, Headey SJ, Vazirani M, Shouldice SR,  
515 Coinçon M, Tay S, Morton CJ, Simpson JS, Martin JL, Scanlon MJ. 2017. Fragment  
516 library screening identifies hits that bind to the non-catalytic surface of *Pseudomonas*  
517 *aeruginosa* DsbA1. *PLOS ONE* 12:e0173436.
- 518 24. Landeta C, Blazyk JL, Hatahet F, Meehan BM, Eser M, Myrick A, Bronstain L,  
519 Minami S, Arnold H, Ke N, Rubin EJ, Furie BC, Furie B, Beckwith J, Dutton R,  
520 Boyd D. 2015. Compounds targeting disulfide bond forming enzyme DsbB of Gram-  
521 negative bacteria. *Nat Chem Biol* 11:292-8.
- 522 25. Früh V, Zhou Y, Chen D, Loch C, Ab E, Grinkova YN, Verheij H, Sligar SG,  
523 Bushweller JH, Siegal G. 2010. Application of fragment-based drug discovery to  
524 membrane proteins: identification of ligands of the integral membrane enzyme DsbB.  
525 *Chemistry & biology* 17:881-891.
- 526 26. Dailey FE, Berg HC. 1993. Mutants in disulfide bond formation that disrupt flagellar  
527 assembly in *Escherichia coli*. *Proceedings of the National Academy of Sciences of*  
528 *the United States of America* 90:1043-1047.
- 529 27. Heras B, Totsika M, Jarrott R, Shouldice SR, Guncar G, Achard ME, Wells TJ,  
530 Argente MP, McEwan AG, Schembri MA. 2010. Structural and functional  
531 characterization of three DsbA paralogues from *Salmonella enterica* serovar  
532 typhimurium. *J Biol Chem* 285:18423-32.
- 533 28. Totsika M, Heras B, Wurple DJ, Schembri MA. 2009. Characterization of Two  
534 Homologous Disulfide Bond Systems Involved in Virulence Factor Biogenesis in  
535 Uropathogenic *Escherichia coli* CFT073. *Journal of Bacteriology* 191:3901.
- 536 29. Totsika M, Vagenas D, Paxman JJ, Wang G, Dhoub R, Sharma P, Martin JL,  
537 Scanlon MJ, Heras B. 2018. Inhibition of Diverse DsbA Enzymes in Multi-DsbA  
538 Encoding Pathogens. *Antioxidants & redox signaling* 29:653-666.

- 539 30. Agudo D, Mendoza MT, Castanares C, Nombela C, Rotger R. 2004. A proteomic  
540 approach to study *Salmonella typhi* periplasmic proteins altered by a lack of the DsbA  
541 thiol: disulfide isomerase. *Proteomics* 4:355-63.
- 542 31. Arts IS, Ball G, Leverrier P, Garvis S, Nicolaes V, Vertommen D, Ize B, Tamu Dufe  
543 V, Messens J, Voulhoux R, Collet JF. 2013. Dissecting the machinery that introduces  
544 disulfide bonds in *Pseudomonas aeruginosa*. *MBio* 4:e00912-13.
- 545 32. Coulthurst SJ, Lilley KS, Hedley PE, Liu H, Toth IK, Salmond GP. 2008. DsbA plays  
546 a critical and multifaceted role in the production of secreted virulence factors by the  
547 phytopathogen *Erwinia carotovora* subsp. *atroseptica*. *J Biol Chem* 283:23739-53.
- 548 33. Hayashi S, Abe M, Kimoto M, Furukawa S, Nakazawa T. 2000. The dsbA-dsbB  
549 disulfide bond formation system of *Burkholderia cepacia* is involved in the production  
550 of protease and alkaline phosphatase, motility, metal resistance, and multi-drug  
551 resistance. *Microbiol Immunol* 44:41-50.
- 552 34. Kim D-H, Kim H-S, Kobashi K. 1992. Purification and Characterization of Novel  
553 Sulfotransferase Obtained from *Klebsiella* K-36, an Intestinal Bacterium of Rat1. *The*  
554 *Journal of Biochemistry* 112:456-460.
- 555 35. Malojčić G, Owen RL, Grimshaw JPA, Brozzo MS, Dreher-Teo H, Glockshuber R.  
556 2008. A structural and biochemical basis for PAPS-independent sulfuryl transfer by  
557 aryl sulfotransferase from uropathogenic *Escherichia coli*. *Proceedings of the*  
558 *National Academy of Sciences of the United States of America* 105:19217-19222.
- 559 36. Kang JW, Jeong YJ, Kwon AR, Yun HJ, Kim DH, Choi EC. 2001. Cloning, sequence  
560 analysis, and characterization of the astA gene encoding an arylsulfate  
561 sulfotransferase from *Citrobacter freundii*. *Arch Pharm Res* 24:316-22.
- 562 37. Kang JW, Kwon AR, Kim DH, Choi EC. 2001. Cloning and sequencing of the astA  
563 gene encoding arylsulfate sulfotransferase from *Salmonella typhimurium*. *Biol Pharm*  
564 *Bull* 24:570-4.
- 565 38. Kwon AR, Oh TG, Kim DH, Choi EC. 1999. Molecular cloning of the arylsulfate  
566 sulfotransferase gene and characterization of its product from *Enterobacter*  
567 *amnigenus* AR-37. *Protein Expr Purif* 17:366-72.
- 568 39. Grimshaw JP, Stirnimann CU, Brozzo MS, Malojcic G, Grutter MG, Capitani G,  
569 Glockshuber R. 2008. DsbL and DsbI form a specific dithiol oxidase system for  
570 periplasmic arylsulfate sulfotransferase in uropathogenic *Escherichia coli*. *J Mol Biol*  
571 380:667-80.
- 572 40. Kwon AR, Choi EC. 2005. Role of disulfide bond of arylsulfate sulfotransferase in  
573 the catalytic activity. *Arch Pharm Res* 28:561-5.
- 574 41. Malapaka VR, Barrese AA, Tripp BC, Tripp BC. 2007. High-throughput screening  
575 for antimicrobial compounds using a 96-well format bacterial motility absorbance  
576 assay. *J Biomol Screen* 12:849-54.
- 577 42. Malojcic G, Owen RL, Glockshuber R. 2014. Structural and mechanistic insights into  
578 the PAPS-independent sulfotransfer catalyzed by bacterial aryl sulfotransferase and  
579 the role of the DsbL/Dsbl system in its folding. *Biochemistry* 53:1870-7.
- 580 43. CLSI. 2015. Clinical and Laboratory Standards Institute (2015) Methods for Dilution  
581 of Antimicrobial Susceptibility Tests for Bacteria That Grow Aerobically, vol  
582 Approved Standard—10th Edition, Wayne, PA.
- 583 44. Reller LB, Weinstein M, Jorgensen JH, Ferraro MJ. 2009. Antimicrobial  
584 Susceptibility Testing: A Review of General Principles and Contemporary Practices.  
585 *Clinical Infectious Diseases* 49:1749-1755.
- 586 45. Rasmussen L, White EL, Pathak A, Ayala JC, Wang H, Wu J-H, Benitez JA, Silva  
587 AJ. 2011. A high-throughput screening assay for inhibitors of bacterial motility

- 588 identifies a novel inhibitor of the Na<sup>+</sup>-driven flagellar motor and virulence gene  
589 expression in *Vibrio cholerae*. *Antimicrob Agents Chemother* 55:4134-4143.
- 590 46. Lloyd AL, Rasko DA, Mobley HL. 2007. Defining genomic islands and uropathogen-  
591 specific genes in uropathogenic *Escherichia coli*. *J Bacteriol* 189:3532-46.
- 592 47. Snyder JA, Haugen BJ, Buckles EL, Lockatell CV, Johnson DE, Donnenberg MS,  
593 Welch RA, Mobley HLT. 2004. Transcriptome of uropathogenic *Escherichia coli*  
594 during urinary tract infection. *Infection and immunity* 72:6373-6381.
- 595 48. Malojčić G, Glockshuber R. 2010. The PAPS-Independent Aryl Sulfotransferase and  
596 the Alternative Disulfide Bond Formation System in Pathogenic Bacteria.  
597 *Antioxidants & Redox Signaling* 13:1247-1259.
- 598 49. Datsenko KA, Wanner BL. 2000. One-step inactivation of chromosomal genes in  
599 *Escherichia coli* K-12 using PCR products. *Proceedings of the National Academy of*  
600 *Sciences* 97:6640.
- 601 50. Bardwell JC, McGovern K, Beckwith J. 1991. Identification of a protein required for  
602 disulfide bond formation in vivo. *Cell* 67:581-9.
- 603 51. Mobley HL, Green DM, Trifillis AL, Johnson DE, Chippendale GR, Lockatell CV,  
604 Jones BD, Warren JW. 1990. Pyelonephritogenic *Escherichia coli* and killing of  
605 cultured human renal proximal tubular epithelial cells: role of hemolysin in some  
606 strains. *Infection and immunity* 58:1281-1289.
- 607
